# Supplementary material for: Birthing balls and peanut balls for labor pain, delivery duration, and mode of delivery: a meta-analysis of randomized controlled trials
Source: PeerJ journal article supplement (doi:10.7717/peerj.21062), 2026-04-02
Supplement: Additional_file_2.pdf [file Additional_file_2.pdf]

### Search strategy.

Pubmed (searched on 10/11/2025)

|    |                                                                                                                                                                                                                                                                                                                                                                                                                                                                     |           |
|----|---------------------------------------------------------------------------------------------------------------------------------------------------------------------------------------------------------------------------------------------------------------------------------------------------------------------------------------------------------------------------------------------------------------------------------------------------------------------|-----------|
| #1 | labor, obstetric[MeSH Terms]                                                                                                                                                                                                                                                                                                                                                                                                                                        | 50,193    |
| #2 | (((((labor) OR (labour)) OR (pregnancy)) OR (pregnant women)) OR (postpartum period)) OR (Obstetric delivery)) OR (Parturition)) OR (Obstetric labor)                                                                                                                                                                                                                                                                                                               | 3,754,742 |
| #3 | (((((labor) OR (labour)) OR (pregnancy)) OR (pregnant women)) OR (postpartum period)) OR (Obstetric delivery)) OR (Parturition)) OR (Obstetric labor)) AND (((((((((((delivery ball) OR (childbirth ball)) OR (birth ball)) OR (birthing ball)) OR (swiss ball)) OR (exercise ball)) OR (sport ball)) OR (bobath ball)) OR (prana ball)) OR (pezzi ball)) OR (childbirth ball)) OR (peanut ball)) OR (peanutball)) OR (peanut labor ball)) OR (peanut shaped ball)) | 1,179     |
| #4 | random*                                                                                                                                                                                                                                                                                                                                                                                                                                                             | 1,943,435 |
| #5 | #1 OR #2                                                                                                                                                                                                                                                                                                                                                                                                                                                            | 3,754,742 |
| #6 | #3 AND #4 AND #5                                                                                                                                                                                                                                                                                                                                                                                                                                                    | 182       |

Cochrane library (searched on 10/11/2025)

|    |                                                                                                                                                                               |         |
|----|-------------------------------------------------------------------------------------------------------------------------------------------------------------------------------|---------|
| #1 | MeSH descriptor: [Labor, Obstetric] explode all trees                                                                                                                         | 3,165   |
| #2 | labor OR labour OR pregnancy OR pregnant women OR postpartum period OR Obstetric delivery OR Parturition OR Obstetric labor                                                   | 103,132 |
| #3 | delivery ball OR childbirth ball OR birth ball OR birthing ball OR swiss ball OR exercise ball OR sport ball OR bobath ball OR prana ball OR pezzi ball OR childbirth ball OR | 2,164   |

|    |                                                                      |           |
|----|----------------------------------------------------------------------|-----------|
|    | peanut ball OR peanutball OR peanut labor ball OR peanut shaped ball |           |
| #4 | Random or Random Allocation or Randomized controlled trials          | 1,412,390 |
| #5 | #1 OR #2                                                             | 103,171   |
| #6 | #3 AND #4 AND #5                                                     | 208       |

EMBASE (searched on 10/11/2025 )

|    |                                                                                                                                                                                                                                                          |           |
|----|----------------------------------------------------------------------------------------------------------------------------------------------------------------------------------------------------------------------------------------------------------|-----------|
| #1 | exp Labor, Obstetric/                                                                                                                                                                                                                                    | 43,421    |
| #2 | (labor or labour or pregnancy or pregnant women or postpartum period or Obstetric delivery or Parturition or Obstetric labor).af.                                                                                                                        | 1,340,836 |
| #3 | (delivery ball or childbirth ball or birth ball or birthing ball or swiss ball or exercise ball or sport ball or bobath ball or prana ball or pezzi ball or childbirth ball or peanut ball or peanutball or peanut labor ball or peanut shaped ball).af. | 396       |
| #4 | Random*                                                                                                                                                                                                                                                  | 2,847,926 |
| #5 | #1 OR #2                                                                                                                                                                                                                                                 | 1,341,070 |
| #6 | #3 AND #4 AND #5                                                                                                                                                                                                                                         | 79        |

Web of Science (searched on 10/11/2025)

|    |                                                                                                                                                                                                                                                         |           |
|----|---------------------------------------------------------------------------------------------------------------------------------------------------------------------------------------------------------------------------------------------------------|-----------|
| #1 | TS=(labor OR labour OR pregnancy OR pregnant women OR postpartum period OR Obstetric delivery OR Parturition OR Obstetric labor)                                                                                                                        | 3,739,170 |
| #2 | TS=(delivery ball OR childbirth ball OR birth ball OR birthing ball OR swiss ball OR exercise ball OR sport ball OR bobath ball OR prana ball OR pezzi ball OR childbirth ball OR peanut ball OR peanutball OR peanut labor ball OR peanut shaped ball) | 52,647    |
| #3 | TS=(random*)                                                                                                                                                                                                                                            | 4,468,059 |

|    |                  |    |
|----|------------------|----|
| #4 | #1 AND #2 AND #3 | 99 |
|----|------------------|----|

Scopus (searched on 10/11/2025)

|    |                                                                                                                                                                                                                                                                                                                                |            |
|----|--------------------------------------------------------------------------------------------------------------------------------------------------------------------------------------------------------------------------------------------------------------------------------------------------------------------------------|------------|
| #1 | TITLE-ABS-KEY ("labor"<br>OR "labour" OR "pregnancy"<br>OR "pregnant women" OR<br>"postpartum period" OR<br>"obstetric delivery" OR<br>"parturition" OR "obstetric<br>labor")                                                                                                                                                  | 1,904,653  |
| #2 | TITLE-ABS-KEY ("delivery<br>ball" OR "childbirth ball" OR<br>"birth ball" OR "birthing ball"<br>OR "swiss ball" OR "exercise<br>ball" OR "sport ball" OR<br>"bobath ball" OR "prana ball"<br>OR "pezzi ball" OR<br>"childbirth ball" OR "peanut<br>ball" OR "peanutball" OR<br>"peanut labor ball" OR<br>"peanut shaped ball") | 584        |
| #3 | ALL FIELDS (random*)                                                                                                                                                                                                                                                                                                           | 10,584,301 |
| #4 | #1 AND #2 AND #3                                                                                                                                                                                                                                                                                                               | 96         |
